# Supplementary material for: Bifidobacterium bifidum CCFM1163 Alleviated Cathartic Colon by Regulating the Intestinal Barrier and Restoring Enteric Nerves
Source: MDPI journal article supplement (doi:10.3390/nu15051146), 2023-02-24
Supplement: s1 [file s1]

**Table S1.** Histopathological grading table.

| Inflammation | Extent               | Crypt damage                     | Percent involvement (%) | Grade |
|--------------|----------------------|----------------------------------|-------------------------|-------|
| None         | None                 | None                             | None                    | 0     |
| Slight       | Mucosa               | 1/3                              | 1-25                    | 1     |
| Moderate     | Mucosa and submucosa | 2/3                              | 26-50                   | 2     |
| Severe       | Transmural           | All                              | 51-75                   | 3     |
| -            | -                    | Entire crypt and epithelium lost | 76-100                  | 4     |

**Table S2.** Primer sequence.

| Gene                           | Sequence (5' -> 3')       | PrimerBank ID |
|--------------------------------|---------------------------|---------------|
| <i>PGP9.5</i>                  | F-AGGGACAGGAAGTTAGCCCTA   | 188219613c1   |
|                                | R-AGCTTCTCCGTTTCAGACAGA   |               |
| <i>S100<math>\beta</math></i>  | F-TGGTTGCCCTCATTGATGTCT   | 6677839a1     |
|                                | R-CCCATCCCCATCTTCGTCC     |               |
| <i>GFAP</i>                    | F-CGGAGACGCATCACCTCTG     | 196115326c1   |
|                                | R-TGGAGGAGTCATTCGAGACAA   |               |
| <i>MUC2</i>                    | F-AGGGCTCGGAAGTCCAGAAA    | 28865873a1    |
|                                | R-CCAGGGAATCGGTAGACATCG   |               |
| <i>ZO-1</i>                    | F-GCCGCTAAGAGCACAGCAA     | 254675278c1   |
|                                | R-GCCCTCCTTTTAACACATCAGA  |               |
| <i>Occludin</i>                | F-TTGAAAGTCCACCTCCTTACAGA | 6679162a1     |
|                                | R-CCGGATAAAAAGAGTACGCTGG  |               |
| <i>Claudin-1</i>               | F-GGGGACAACATCGTGACCG     | 7710002a1     |
|                                | R-AGGAGTCGAAGACTTTGCACT   |               |
| <i>Claudin-4</i>               | F-ATGGCGTCTATGGGACTACAG   | 160333265c1   |
|                                | R-GAGCGCACAACCTCAGGATG    |               |
| <i>TNF-<math>\alpha</math></i> | F-CCCTCACACTCAGATCATCTTCT | 7305585a1     |
|                                | R-GCTACGACGTGGGCTACAG     |               |
| <i>IL-1<math>\beta</math></i>  | F-GAAATGCCACCTTTTGACAGTG  | 118130747c1   |
|                                | R-TGGATGCTCTCATCAGGACAG   |               |
| <i>IL-6</i>                    | F-CTGCAAGAGACTTCCATCCAG   | 13624310c1    |
|                                | R-AGTGGTATAGACAGGTCTGTTGG |               |
| <i>5-HT<sub>2B</sub></i>       | F-ACCTGATCCTGACTAACCGTT   | 118130975c1   |

|                         |                           |             |
|-------------------------|---------------------------|-------------|
|                         | R-TGGGTATTATCACCGCGAGTAT  |             |
| <i>5-HT<sub>4</sub></i> | F-AGTTCCAACGAGGGTTTCAGG   | 6680325a1   |
|                         | R-CAGCAGGTTGCCCAAGATG     |             |
| <i>AQP4</i>             | F-AGTCACCACGGTTCATGGAAA   | 160415210c2 |
|                         | R-CATGCTGGCTCCAGTATAATTGA |             |
| <i>AQP8</i>             | F-TGTGTAGTATGGACCTACCTGAG | 6680714a1   |
|                         | R-ACCGATAGACATCCGATGAAGAT |             |
| <i>GPR41</i>            | F-CTTCTTTCTTGGCAATTACTGGC | 142345193c1 |
|                         | R-CCGAAATGGTCAGGTTTAGCAA  |             |
| <i>GPR43</i>            | F-CTTGATCCTCACGGCCTACAT   | 22122727a1  |
|                         | R-CCAGGGTCAGATTAAGCAGGAG  |             |
| <i>Gapdh</i>            | F-AGGTCGGTGTGAACGGATTTG   | 126012538c1 |
|                         | R-GGGGTCGTTGATGGCAACA     |             |
